# Supplementary figures and images for: Novel animal models for studying complex brain disorders: BAC-driven miRNA-mediated in vivo silencing of gene expression
Source: PubMed Central journal article supplement — Mol Psychiatry. 2010 Feb 2;15(10):987–95. doi: 10.1038/mp.2010.1 (PMC3011211; doi:10.1038/mp.2010.1), 2010-02-02

# Generation of BAC-driven miRNA knockdown transgenic mice

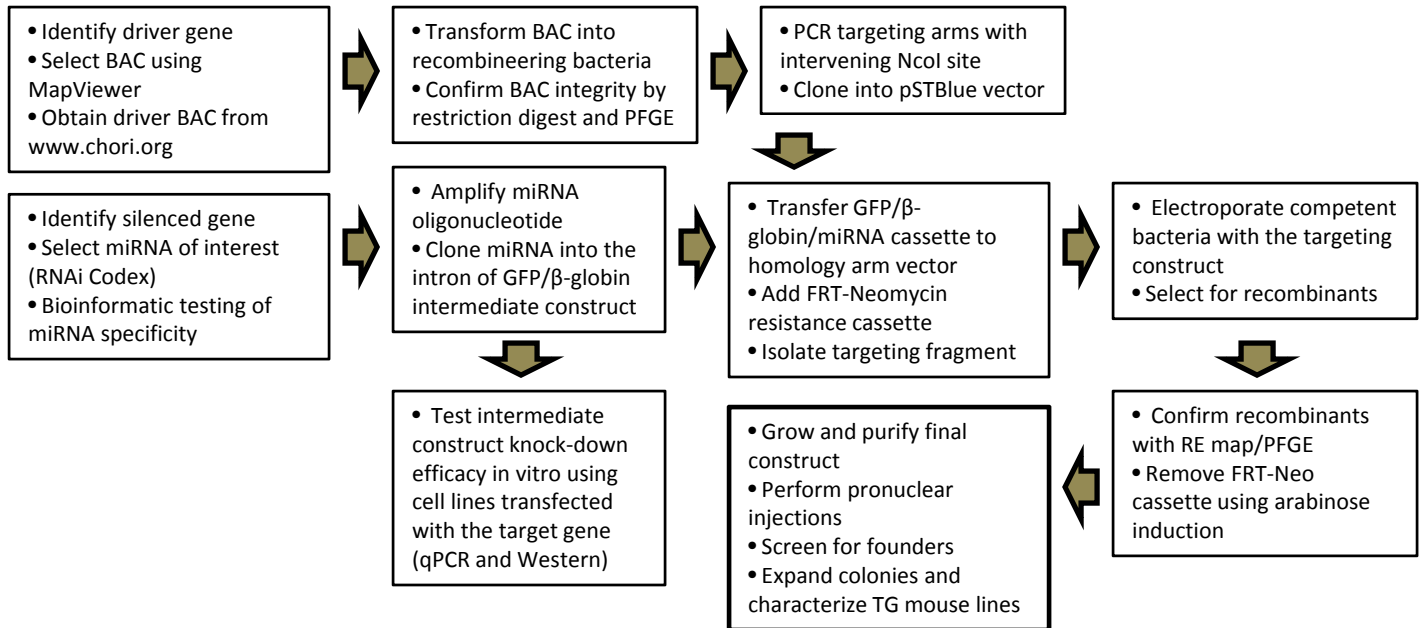

Supplement: mp20101x1.pdf [file mp20101x1.pdf]

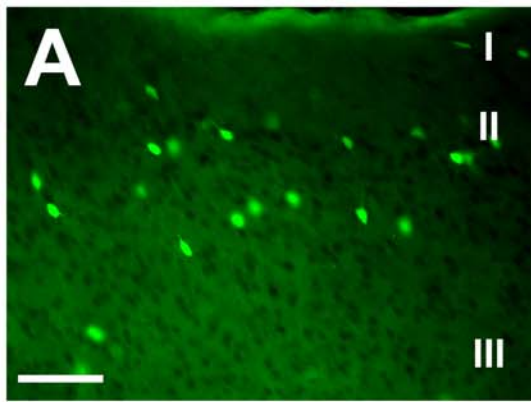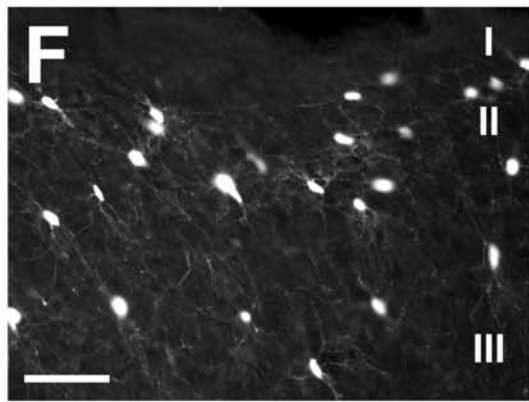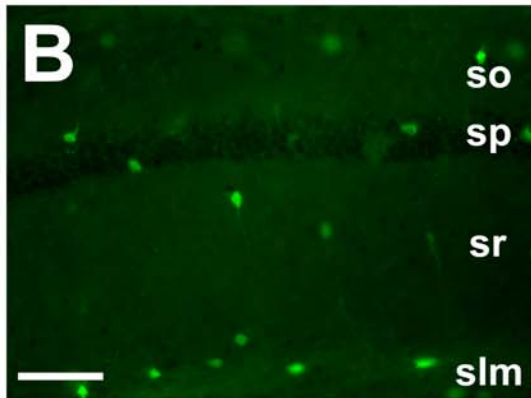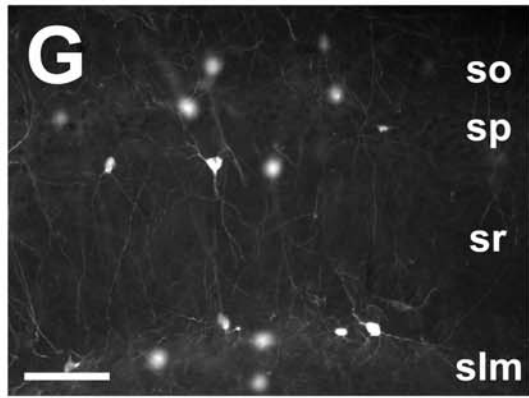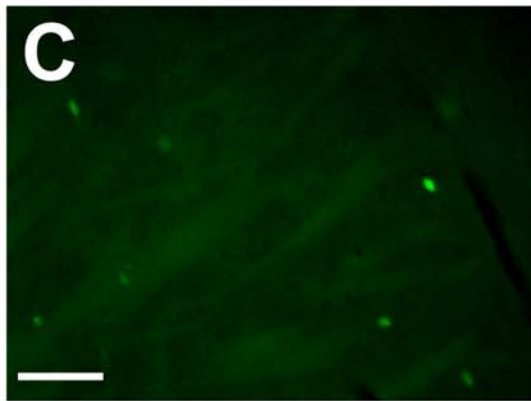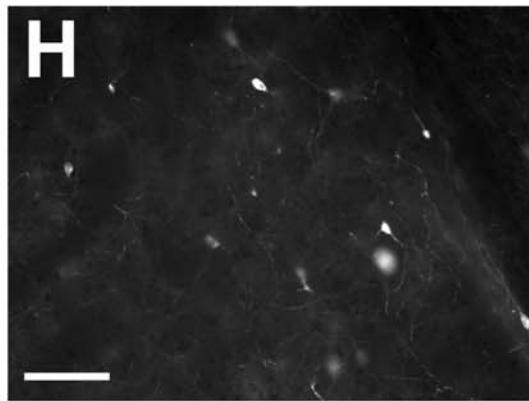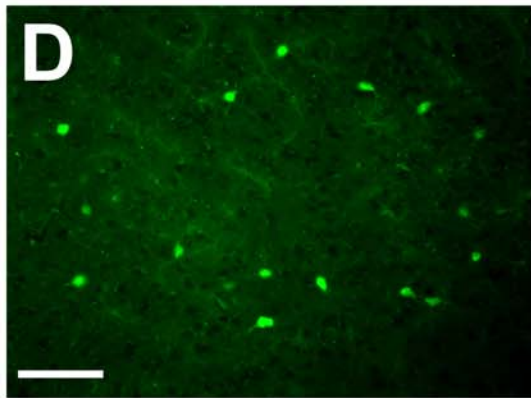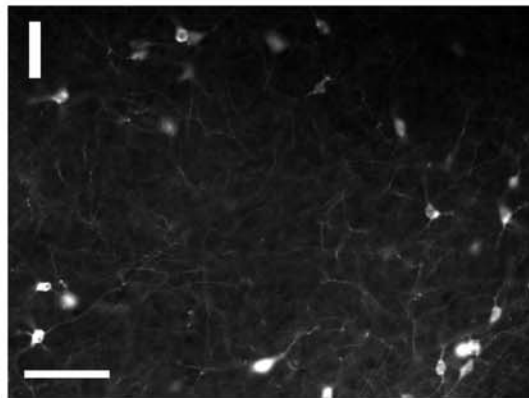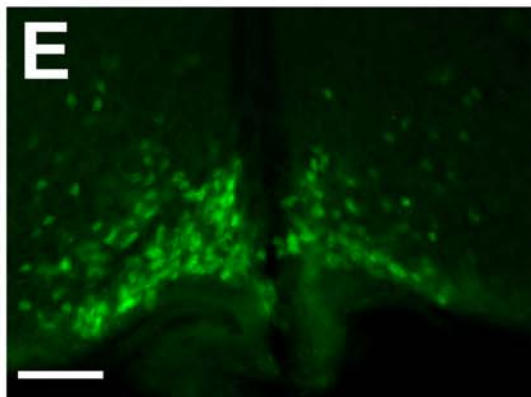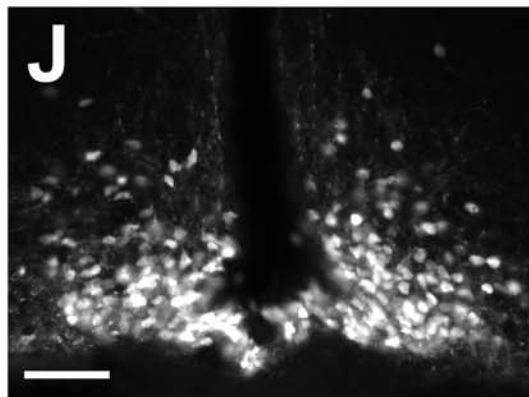

Supplement: mp20101x3.pdf [file mp20101x3.pdf]

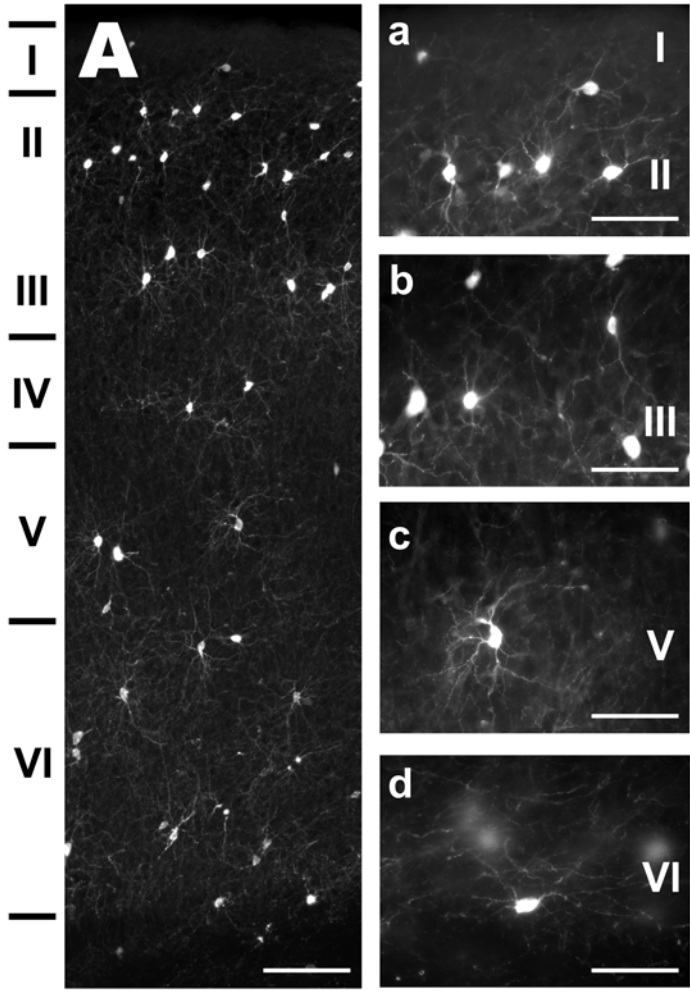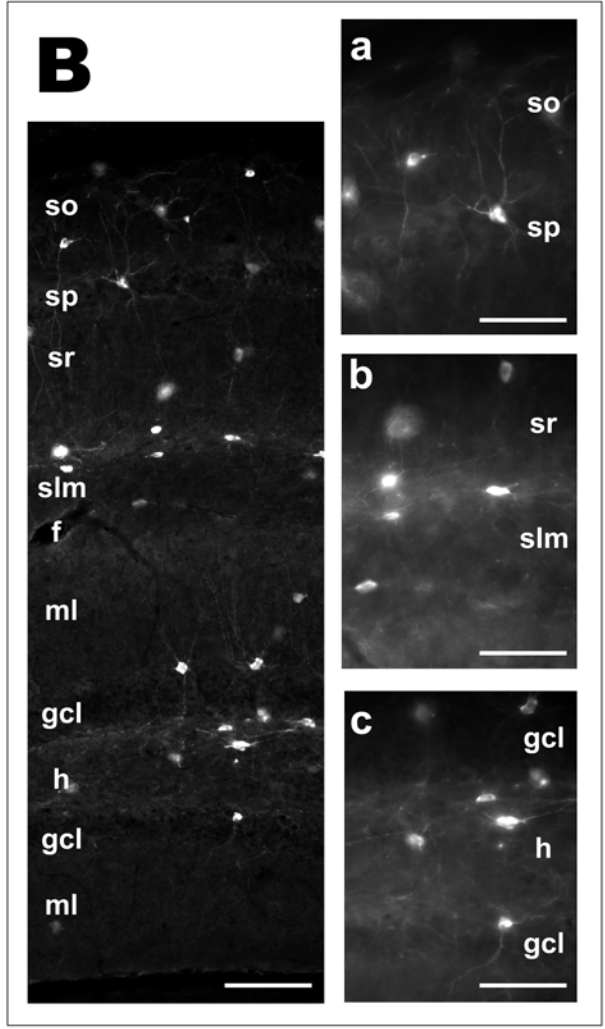

Supplement: mp20101x4.pdf [file mp20101x4.pdf]

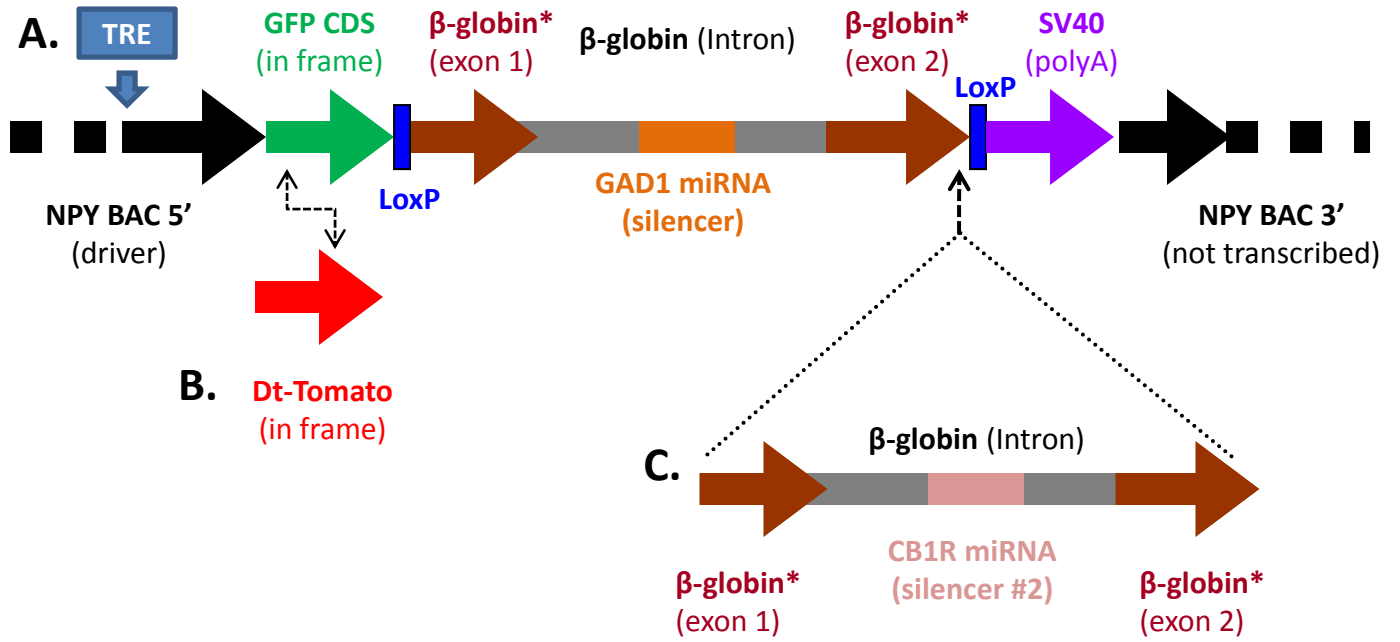

Supplement: mp20101x6.pdf [file mp20101x6.pdf]
